# Supplementary material for: Warming resistant corals from the Gulf of Aqaba live close to their cold-water bleaching threshold
Source: PubMed Central journal article supplement (PMC8005291; doi:10.7717/peerj.11100), 2021-03-25

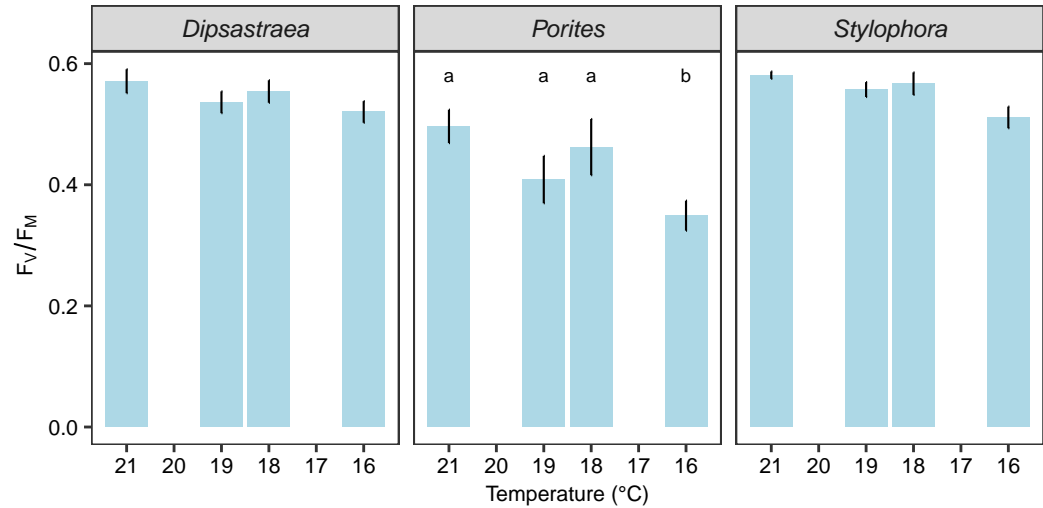

Supplement: peerj-09-11100-s003.pdf [file peerj-09-11100-s003.pdf]
